# Supplementary material
Source: PubMed Central journal article supplement (PMC8045504)
Supplement: advancesADV2020003865-suppl1.pdf [file advancesADV2020003865-suppl1.pdf]

**Supplementary Table 1. Univariable logistic regression analysis of risk factors for occurrence of LRTI (N = 297) and univariable Cox regression analysis of risk factors for progression from URTI to LRTI (N = 279)**

| Covariates                    | Categories                                 | Odds Ratio       | P-values | Hazard Ratio     | P-values |
|-------------------------------|--------------------------------------------|------------------|----------|------------------|----------|
|                               |                                            | (95% CI)         |          | (95% CI)         |          |
|                               |                                            | -occurrence-     |          | -progression-    |          |
| Age (years) at HCoV diagnosis | 40-60 vs. <40                              | 1.71 (0.81-3.63) | 0.16     | 1.73 (0.65-4.57) | 0.27     |
|                               | >60 vs. <40                                | 1.49 (0.64-3.45) | 0.35     | 1.83 (0.66-5.09) | 0.24     |
|                               | <18 vs. ≥18                                | 0.59 (0.24-1.46) | 0.25     | 0.78 (0.27-2.28) | 0.65     |
| Age at diagnosis, yr          | as continuous                              | 1.01 (0.99-1.02) | 0.29     | 1.01 (0.99-1.03) | 0.38     |
| Gender                        | Male vs. Female                            | 1.88 (0.94-3.77) | 0.08     | 1.96 (0.78-4.93) | 0.15     |
| Year of transplant            | 2014-2018 vs. 2008-13                      | 1.30 (0.68-2.51) | 0.43     | 1.99 (0.86-4.62) | 0.11     |
| Year of transplant            | as continuous                              | 1.04 (0.93-1.17) | 0.52     | 1.08 (0.95-1.24) | 0.24     |
| Transplant number             | Second or higher HCT vs. first HCT         | 1.48 (0.69-3.14) | 0.31     | 2.35 (1.01-5.49) | 0.05     |
| Stem cell source              | Bone marrow vs. Peripheral blood stem cell | 0.80 (0.31-2.03) | 0.63     | 0.83 (0.24-2.84) | 0.77     |
|                               | Cord blood vs. Peripheral blood stem cell  | 1.58 (0.66-3.76) | 0.31     | 2.03 (0.74-5.60) | 0.17     |

|                                                             |                                     |                  |      |                  |      |
|-------------------------------------------------------------|-------------------------------------|------------------|------|------------------|------|
| <b>Donor type</b>                                           | Unrelated vs. Related               | 0.85 (0.43-1.66) | 0.63 | 0.64 (0.29-1.40) | 0.26 |
| <b>Human leukocyte antigen</b>                              | Others vs. Matched/Related          | 1.33 (0.60-2.91) | 0.48 | 1.16 (0.46-2.90) | 0.76 |
| <b>Recipient blood type</b>                                 | O vs. Others (including missing)    | 1.42 (0.72-2.82) | 0.32 | 1.62 (0.69-3.82) | 0.27 |
|                                                             | B vs. Others (including missing)    | 0.59 (0.16-2.15) | 0.42 | 0.74 (0.16-3.50) | 0.71 |
| <b>Donor blood type</b>                                     | O vs. Others (including missing)    | 0.99 (0.50-1.95) | 0.97 | 0.98 (0.42-2.26) | 0.96 |
|                                                             | B vs. Others (including missing)    | 0.82 (0.26-2.59) | 0.74 | 1.18 (0.33-4.23) | 0.80 |
| <b>Conditioning regimen</b>                                 | Myeloablative vs. Non-myeloablative | 1.16 (0.58-2.30) | 0.68 | 1.00 (0.44-2.28) | 0.99 |
| <b>Body habitus<sup>a</sup></b>                             | Overweight vs. Underweight/Normal   | 1.65 (0.78-3.51) | 0.19 | 1.47 (0.60-3.63) | 0.40 |
|                                                             | Obese vs. Underweight/Normal        | 1.30 (0.57-2.97) | 0.54 | 1.14 (0.40-3.20) | 0.81 |
| <b>Diabetic state at HCT</b>                                | Yes vs. No                          | 1.01 (0.28-3.66) | 0.98 | 0.44 (0.06-3.34) | 0.43 |
|                                                             | Missing vs. No                      | 0.87 (0.38-2.00) | 0.74 | 1.41 (0.56-3.58) | 0.46 |
| <b>Smoking status</b>                                       | Never vs. Others                    | 1.00 (0.46-2.15) | 0.10 | 1.33 (0.50-3.56) | 0.57 |
| <b>Recipient CMV status</b>                                 | (+) vs. (-)                         | 1.20 (0.60-2.42) | 0.61 | 0.91 (0.40-2.06) | 0.82 |
| <b>Donor CMV status</b>                                     | (+) vs. (-)                         | 0.69 (0.35-1.35) | 0.28 | 0.81 (0.36-1.80) | 0.60 |
| <b>Days between date of HCT and onset of HCoV infection</b> | 31-365 vs. <=30                     | 1.16 (0.44-3.04) | 0.76 | 1.60 (0.58-4.42) | 0.37 |
|                                                             | >365 vs. <=30                       | 0.88 (0.31-2.53) | 0.81 | 0.73 (0.19-2.77) | 0.65 |

|                                                             |                                                                    |                  |      |                  |      |
|-------------------------------------------------------------|--------------------------------------------------------------------|------------------|------|------------------|------|
| <b>Days between date of HCT and onset of HCoV infection</b> | Lower quartile (57) – median (155) vs. <= lower quartile (57)      | 1.25 (0.46-3.37) | 0.66 | 2.33 (0.78-6.95) | 0.13 |
|                                                             | Median (155) – upper quartile (474) vs. <= lower quartile (57)     | 2.19 (0.88-5.46) | 2.19 | 2.07 (0.76-5.60) | 0.15 |
|                                                             | > upper quartile (474) vs. <= lower quartile (57)                  | 0.94 (0.33-2.66) | 0.91 | 0.52 (0.11-2.55) | 0.42 |
| <b>Acute GVHD as time-dependent</b>                         | Grade 2-4 vs. Grade 0-1                                            |                  |      | 0.80 (0.25-2.51) | 0.70 |
| <b>Chronic GVHD as time-dependent</b>                       | Yes vs. None                                                       |                  |      | 0.48 (0.14-1.61) | 0.24 |
| <b>HCoV Ct values</b>                                       | >median (26.2) vs. <=median (26.2)                                 | 2.24 (0.99-5.04) | 0.05 | 3.01 (1.12-8.11) | 0.03 |
|                                                             | Missing vs. <=median (26.2)                                        | 1.67 (0.69-4.02) | 0.25 | 1.26 (0.42-3.76) | 0.68 |
| <b>HCoV Ct values</b>                                       | >lowest 20th percentile (22.4) vs. <=lowest 20th percentile (22.4) | 1.80 (0.59-5.46) | 0.30 | 1.50 (0.43-5.19) | 0.53 |
|                                                             | Missing vs. <=lowest 20th percentile (22.4)                        | 1.71 (0.52-5.61) | 0.37 | 0.98 (0.25-3.83) | 0.98 |

|                                                               |                              |                  |       |                  |      |
|---------------------------------------------------------------|------------------------------|------------------|-------|------------------|------|
| <b>Copathogen in upper respiratory tract<sup>b</sup></b>      | Yes vs. No                   | 2.08 (1.04-4.18) | 0.04  | 1.92 (0.85-4.34) | 0.12 |
| <b>Copathogen in blood<sup>c</sup></b>                        | Yes vs. No                   | 2.14 (0.93-4.91) | 0.07  | 1.49 (0.55-3.99) | 0.43 |
| <b>Immunodeficiency scoring index<sup>b</sup></b>             | Moderate (3-6) vs. Low (0-2) | 13.6 (1.83-101)  | 0.01  |                  |      |
|                                                               | High (7-11) vs. Low (0-2)    | 22.9 (2.58-204)  | <0.01 |                  |      |
|                                                               | as continuous                | 1.27 (1.10-1.48) | <0.01 | 1.16 (0.98-1.36) | 0.08 |
| <b>Neutrophil count (x10<sup>6</sup> cells/L)<sup>d</sup></b> | <=500 vs. >500               | 2.33 (0.86-6.33) | 0.10  | 1.36 (0.45-4.11) | 0.58 |
|                                                               | Missing vs. >500             | 2.21 (0.82-5.96) | 0.12  | 1.63 (0.48-5.56) | 0.43 |
| <b>Lymphocyte count (x10<sup>6</sup> cells/L)<sup>d</sup></b> | <=300 vs. >300               | 1.24 (0.51-3.02) | 0.64  | 1.06 (0.39-2.89) | 0.91 |
|                                                               | Missing vs. >300             | 1.87 (0.70-5.00) | 0.21  | 1.50 (0.44-5.14) | 0.52 |
|                                                               | <=200 vs. >200               | 1.30 (0.46-3.64) | 0.62  | 1.07 (0.36-3.20) | 0.90 |
|                                                               | Missing vs. >200             | 1.86 (0.70-4.95) | 0.22  | 1.50 (0.44-5.11) | 0.51 |
|                                                               | <=100 vs. >100               | 1.63 (0.44-6.06) | 0.47  | 1.40 (0.41-4.80) | 0.59 |
|                                                               | Missing vs. >100             | 1.86 (0.70-4.93) | 0.21  | 1.55 (0.46-5.23) | 0.48 |

|                                                             |                                                     |                  |       |                  |       |
|-------------------------------------------------------------|-----------------------------------------------------|------------------|-------|------------------|-------|
| <b>Monocyte count (x10<sup>6</sup> cells/L)<sup>d</sup></b> | <=300 vs. >300                                      | 2.15 (1.05-4.38) | 0.04  | 1.56 (0.66-3.65) | 0.31  |
|                                                             | Missing vs. >300                                    | 2.34 (0.85-6.45) | 0.1   | 1.74 (0.49-6.11) | 0.39  |
|                                                             | <=200 vs. >200                                      | 2.63 (1.21-5.70) | 0.02  | 1.66 (0.67-4.10) | 0.27  |
|                                                             | Missing vs. >200                                    | 2.25 (0.83-6.11) | 0.11  | 1.70 (0.49-5.89) | 0.40  |
|                                                             | <=100 vs. >100                                      | 3.55 (1.52-8.30) | <0.01 | 1.96 (0.76-5.07) | 0.17  |
|                                                             | Missing vs. >100                                    | 2.23 (0.83-6.02) | 0.11  | 1.71 (0.50-5.90) | 0.39  |
| <b>Albumin (g/dl)<sup>e</sup></b>                           | <=3 vs. >3                                          | 3.46 (1.68-7.13) | <0.01 | 0.99 (0.38-2.56) | 0.98  |
|                                                             | Missing vs. >3                                      | 0.50 (0.11-2.24) | 0.37  | 0.54 (0.12-2.38) | 0.42  |
| <b>Glucose (mg/dl)<sup>d</sup></b>                          | >150 vs. <=150                                      | 3.57 (1.68-7.57) | <0.01 | 2.46 (1.02-5.95) | 0.05  |
|                                                             | Missing vs. <=150                                   | 1.16 (0.44-3.03) | 0.77  | 0.98 (0.32-3.04) | 0.97  |
| <b>Steroid dose (mg/kg)<sup>f</sup></b>                     | <1 vs. None                                         | 2.29 (1.10-4.77) | 0.03  | 2.09 (0.83-5.25) | 0.12  |
|                                                             | >=1 vs. None                                        | 2.90 (0.98-8.59) | 0.05  | 2.80 (0.89-8.86) | 0.08  |
| <b>Combined steroid and glucose (mg/dl)<sup>d,f</sup></b>   | Steroid + Glucose (<=150 or unknown) vs. No steroid | 1.65 (0.76-3.58) | 0.21  | 1.53 (0.58-4.02) | 0.39  |
|                                                             | Steroid + Glucose (>150) vs. No steroid             | 6.29 (2.53-15.7) | <0.01 | 5.58 (2.01-15.5) | <0.01 |

|                                     |                                                                         |                  |       |                  |      |
|-------------------------------------|-------------------------------------------------------------------------|------------------|-------|------------------|------|
| <b>Glucose (mg/dl)</b> <sup>g</sup> | >150 on most recent day only vs.<br><=150 or unknown                    | 2.88 (0.94-8.81) | 0.06  | 2.87 (0.82-10.0) | 0.10 |
|                                     | >150 on most recent day and >150 on<br>another day vs. <=150 or unknown | 3.56 (1.49-8.50) | <0.01 | 2.07 (0.74-5.77) | 0.17 |
|                                     | Any glucose value other than most<br>recent >150 vs. <=150 or unknown   | 0.78 (0.28-2.16) | 0.63  | 0.72 (0.21-2.52) | 0.61 |
| <b>HbA1c</b> <sup>h</sup>           | >=6.5 vs. <6.5                                                          | 0.96 (0.21-4.38) | 0.96  | 1.29 (0.13-12.6) | 0.83 |
|                                     | Missing vs. <6.5                                                        | 0.59 (0.24-1.47) | 0.26  | 0.96 (0.29-3.23) | 0.95 |

<sup>a</sup> Overweight is defined as a body mass index (BMI)  $\geq 25$  and  $< 30$  for adults, and  $\geq 85^{\text{th}}$  percentile and  $< 95^{\text{th}}$  percentile for children of the same age and sex. Obesity is defined as a BMI  $\geq 30$  for adults, and  $\geq 95^{\text{th}}$  percentile for children of the same age and sex according to the Centers for Disease Control and Prevention.

<sup>b</sup> at HCoV diagnosis.

<sup>c</sup> defined as a pathogen or antigen (bacteria, fungi, virus, Aspergillus galactomannan enzyme-linked immunosorbent assay) detected in a blood within 2 days of HCoV diagnosis.

<sup>d</sup> using nearest value within 2 weeks before HCoV diagnosis.

<sup>e</sup> lowest albumin value in the 2 weeks before HCoV diagnosis.

<sup>f</sup> highest daily steroid dose in the 2 weeks before HCoV diagnosis.

<sup>g</sup> using values within 2 weeks before HCoV diagnosis.

<sup>h</sup> highest HbA1c (%) within 3 months before HCoV diagnosis.

Abbreviations: URTI = upper respiratory tract infection, LRTI = lower respiratory tract infection, CI = confidence interval, PBSC = peripheral blood stem cell, CMV = cytomegalovirus, HCT = hematopoietic cell transplantation, GVHD = graft-versus-host disease, Ct = cycle threshold.

Supplementary Figure 1. Flow chart of study subjects for each outcome

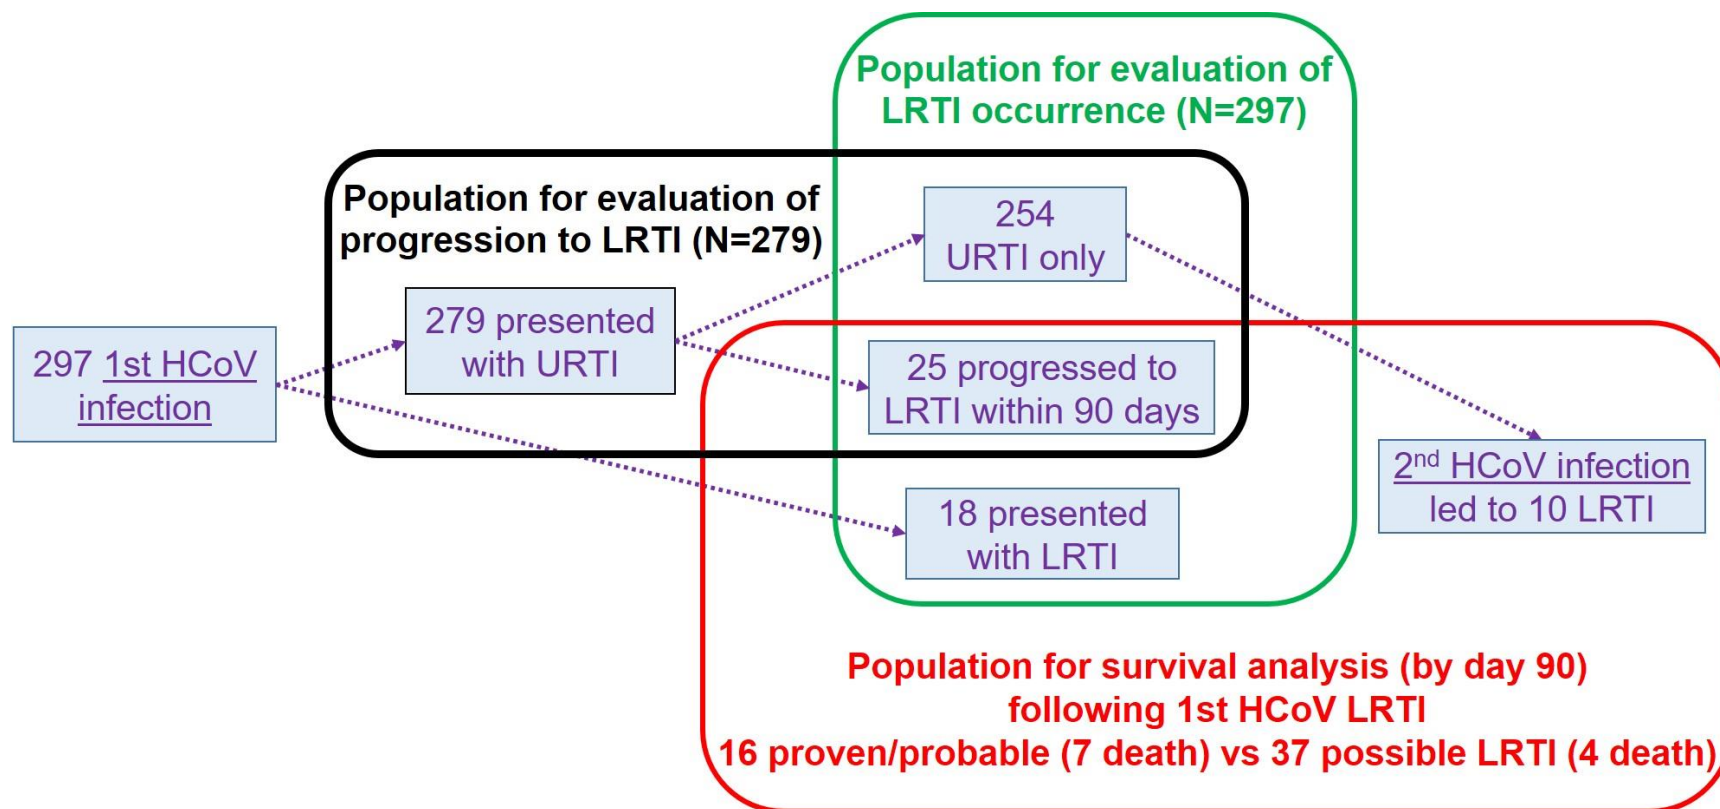

Abbreviations: HCoV= human coronavirus, URTI = upper respiratory tract infection, LRTI = lower respiratory tract infection
